# Supplementary material
Source: MDPI journal article supplement (https://www.mdpi.com/2227-9040/11/5/265)
Supplement: s1 [file s1]

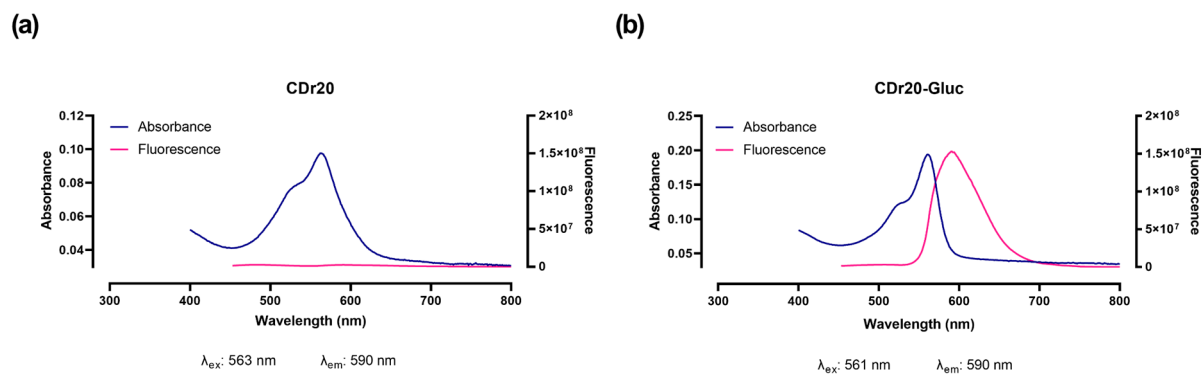

**Figure S1. The spectra of CDr20 and CDr20-Gluc.** (a) The absorbance and fluorescent spectra for CDr20, which shows maximum absorbance at 563 nm wavelength, but no fluorescence peak (100  $\mu$ M in Tris buffer, pH 7.5). (b) The absorbance and fluorescent spectra for CDr20-Gluc ( $\lambda_{abs, max} / \lambda_{emi, max} = 561 / 590$  nm; 100  $\mu$ M in Tris buffer, pH 7.5).

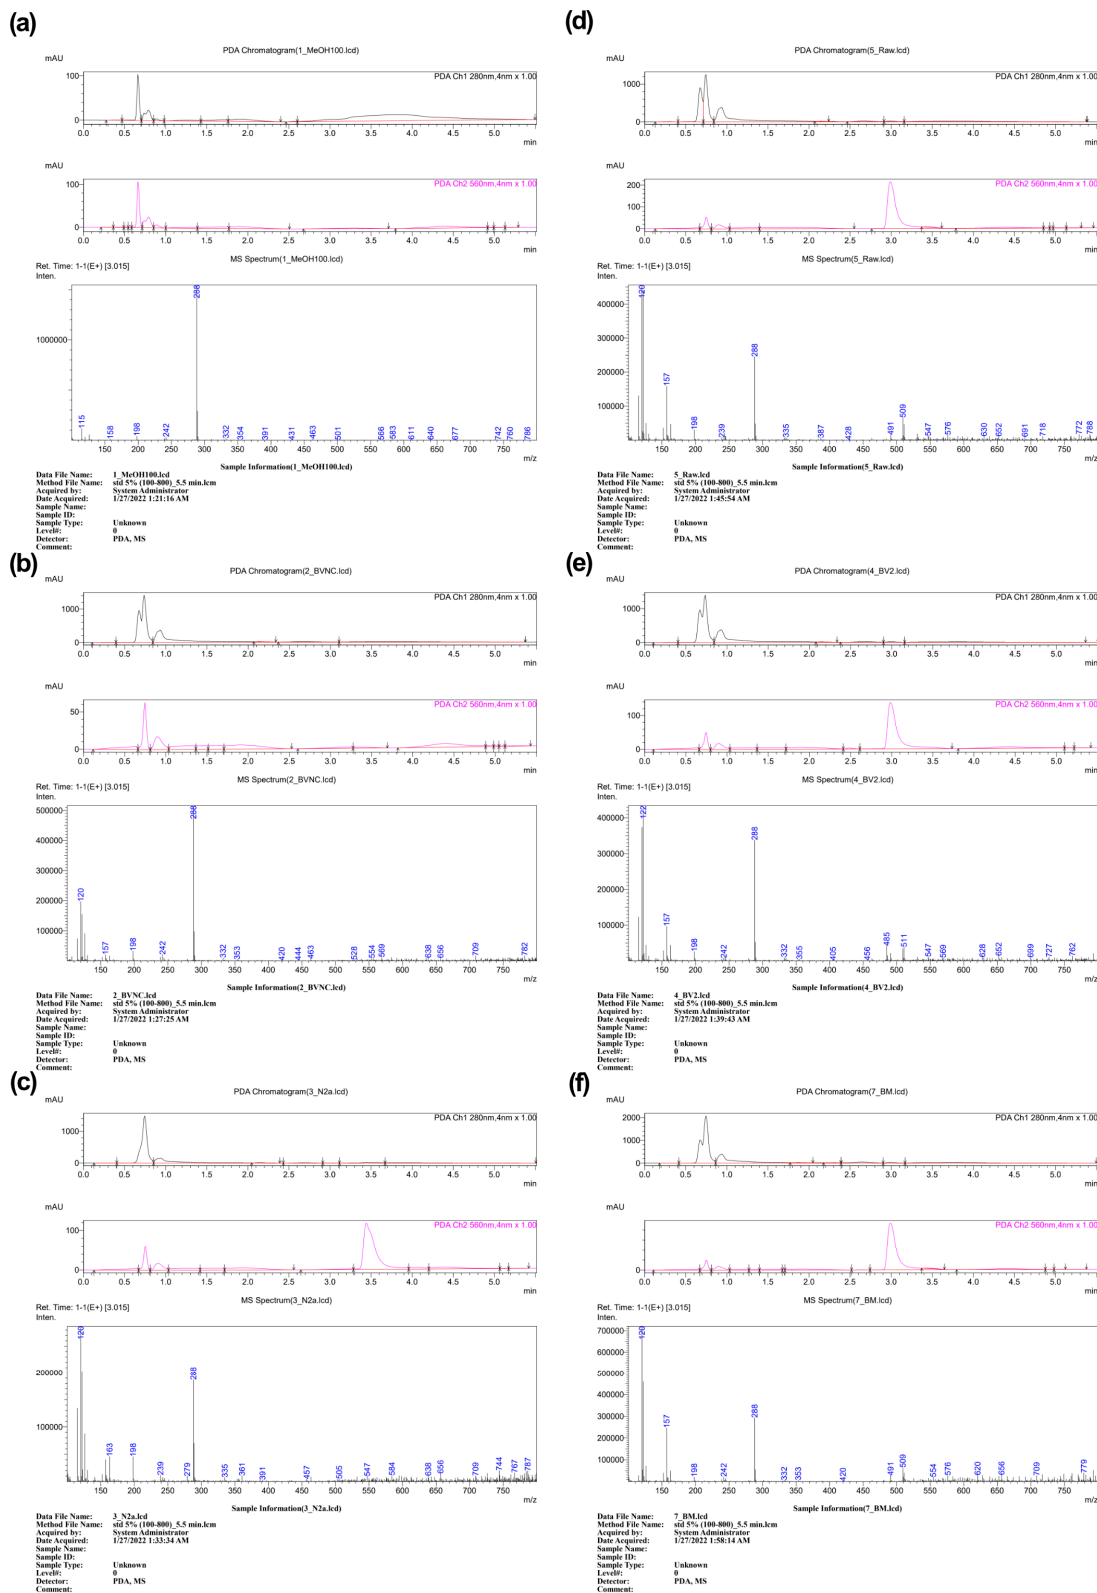

**Figure S2.** LC-MS characterization of a CDr20-Gluc resulted from the intracellular reaction of CDr20 with Ugt1a7c. (a) – (f) full traces of PDA chromatographs and mass spectra 100% Methanol (a), BV2 non-stained control (b), CDr20 stained N2a (c), CDr20 stained BV2 (d), CDr20 stained Raw264.7 (e) and CDr20 stained mouse bone marrow (f), respectively.

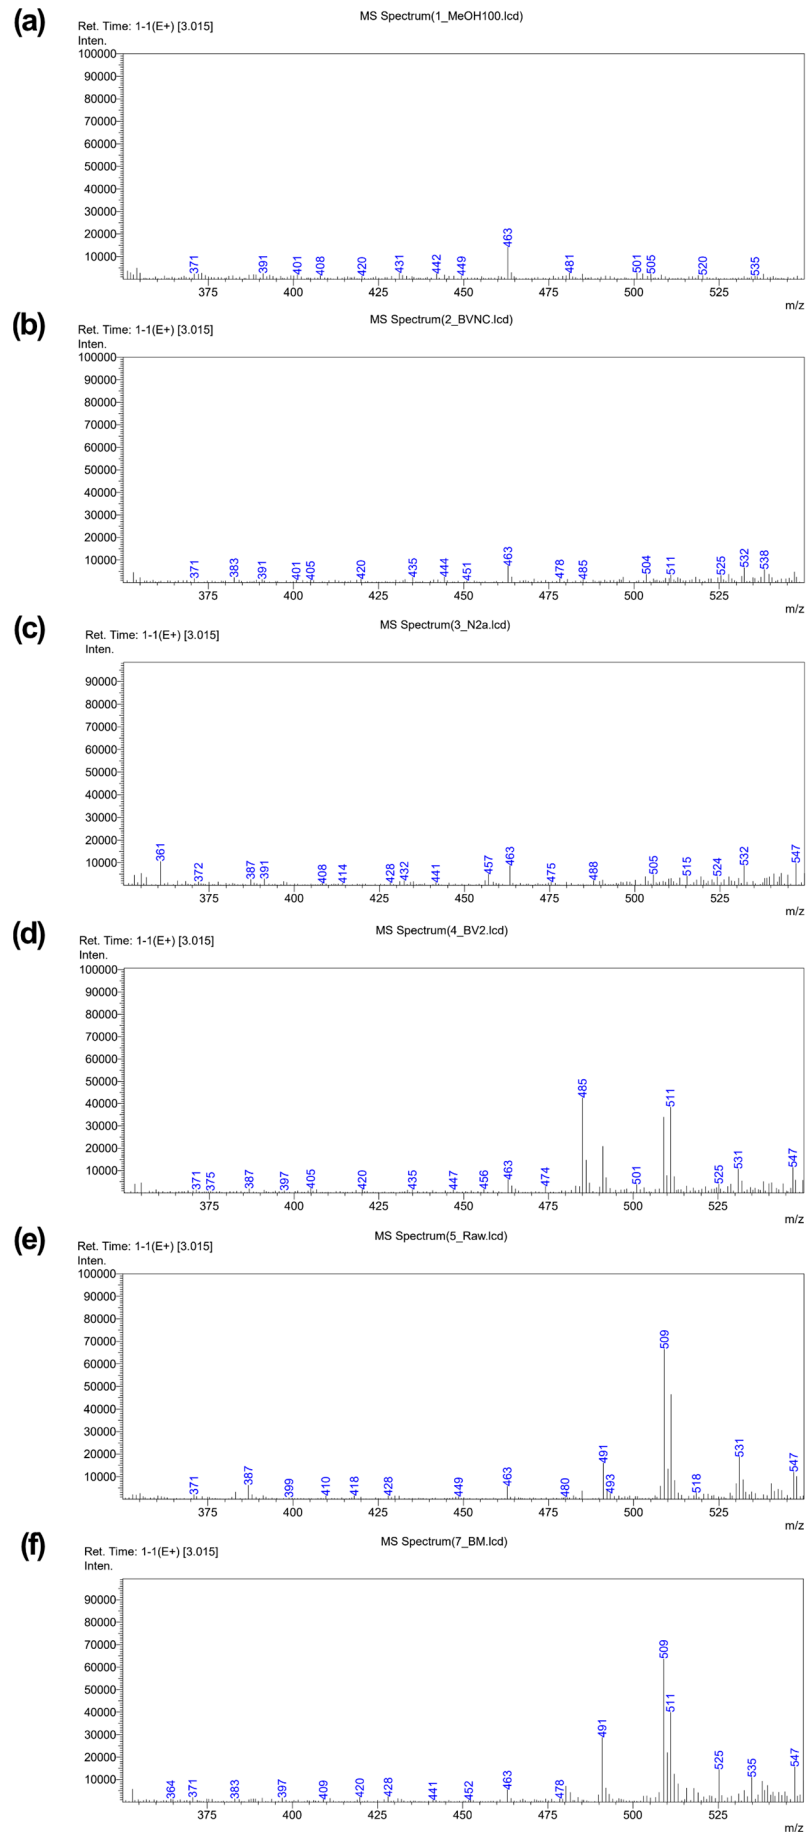

**Figure S3. Scaled-up mass spectra of CDr20-Gluc from 350 to 550 m/z (a) – (f) scaled-up mass spectra from 350 m/z to 550 m/z of 100% Methanol (a), BV2 non-stained control (b), CDr20 stained**

N2a (c), CDr20 stained BV2 (d), CDr20 stained Raw264.7 (e) and CDr20 stained mouse bone marrow (f), respectively.
