# Supplementary material
Source: MDPI journal article supplement (https://www.mdpi.com/2227-9040/11/5/265)
Supplement: s1 [file s1]

Archive with 2 entries (2 files):
- chemosensors-2295054-Supplementary_final.pdf
- Movie S1, 12fps 480p.mp4
